# Supplementary material
Source: Elsevier journal article supplement (https://www.sciencedirect.com/science/article/pii/S1138359314004444)
Supplement: mmc1 [file S1138359314004444:mmc1.pdf]

TÁCHESE EN CADA PREGUNTA LO QUE PROCEDA, EN FUNCIÓN DEL GRADO DE ACUERDO CON CADA UNA DE LAS DEFINICIONES

MUCHO      REGULAR      POCO      NADA

2. Soy de la opinión de que los cuidados paliativos va dirigido solamente a los pacientes con cáncer que se encuentran en la última fase de su vida

MUCHO      REGULAR      POCO      NADA

3. Creo que los Cuidados Paliativos son de utilidad

MUCHO      REGULAR      POCO      NADA

4. Me considero suficientemente formado en cuidados paliativos

MUCHO      REGULAR      POCO      NADA

5. Me gustaría recibir formación sobre este tema

MUCHO      REGULAR      POCO      NADA

#### **Aspectos relacionados con cuidados físicos del paciente**

1. Conozco los cuidados y manejo del aseo en el paciente en fase de últimos días manteniendo al paciente confortable y limpio en todo momento, doy masajes suaves con crema hidratante, siempre que no moleste al paciente o le provoque dolor y si el enfermo está cómodo no hago cambios posturales, ya que en ocasiones la movilización es dolorosa.

MUCHO      REGULAR      POCO      NADA

2. En los cuidados de la alimentación conozco que las comidas se han de ofrecer según los gustos y deseos del paciente , la cantidad de cada ingesta se adaptará al enfermo, aprovechar el momento de mayor apetito del día ,dar flexibilidad horaria para que los pacientes puedan comer cuando les plazca.

MUCHO                  REGULAR                  POCO                  NADA

3. Sé reconocer una úlcera tumoral cuando la veo y conozco las medidas a llevar a cabo para el tratamiento del mal olor que ocasionan con gel de metronidazol o carbón activado , el exudado con curas húmedas y hemorragia local con apósitos hemostáticos

MUCHO                  REGULAR                  POCO                  NADA

4. Sé manejar los cuidados en un paciente con xerostomía ( boca seca ) como mantener la mucosa y labios limpios, hidratados, frescos , chupar trocitos de hielo, pequeños sorbos de bebidas muy frías, la piña o la infusión fría de manzanilla con limón

MUCHO                  REGULAR                  POCO                  NADA

5. Sé como manejar los cuidados del estreñimiento procurando que se no se demore el acto de la defecación, cuidando el ambiente en el que se va a defecar, procurando que haya intimidad y ofrecer dieta rica en fibra

MUCHO                  REGULAR                  POCO                  NADA

6. En la disfagia ( dificultad para tragar ) estoy informado que al paciente hay que sentarle para darle de comer, triturar los alimentos, utilizar espesantes, dar volúmenes escasos,

MUCHO                  REGULAR                  POCO                  NADA

7. Conozco que ante un paciente con náuseas y vómitos se debe evitar el olor de los alimentos mientras se cocina, o la visión de los alimentos antes de su llegada a la mesa. Las comidas deben ser escasas y frecuentes, con alimentos que sean del agrado del paciente, evitando los olores intensos y utilizar los alimentos fríos y de masticación fácil. Sé que también es frecuente que los pacientes rechacen las carnes y que muestren preferencia por alimentos que antes no eran de su especial agrado.

MUCHO                  REGULAR                  POCO                  NADA

8. Conozco las medidas para abordar la astenia ( debilidad ) mediante educación sanitaria dirigida al paciente, programas individualizados de ejercicio físico, cuando se pueda y mediante consejos relativos al sueño, higiene, manejo del estrés, técnicas de relajación, nutrición adecuada e hidratación

MUCHO                  REGULAR                  POCO                  NADA

9. Ante un paciente terminal que manifiesta dolor le creo siempre y no juzgo si tiene o no realmente ese dolor.

MUCHO                  REGULAR                  POCO                  NADA

10. En el manejo de la disnea ( sensación del falta de aire ) sé que al paciente hay que transmitir tranquilidad, mantener un ambiente tranquilo a su alrededor, intentar que el paciente no se quede solo, ventilar el lugar donde se encuentra el enfermo, aportando aire fresco en la cara, buscando la posición más confortable para el enfermo

MUCHO                  REGULAR                  POCO                  NADA

11. Ante un cuadro de insomnio conozco que hay que intentar que aumente la actividad diaria y ejercicio moderado si es posible, disminuya los periodos de sueño durante el día y mantener horarios regulares, disminuya los ruidos nocturnos , luz excesiva, calor y las interrupciones excesivas, ofrecer alguna bebida caliente antes de dormir y favorezco que el paciente exprese sus preocupaciones y miedos.

MUCHO                  REGULAR                  POCO                  NADA

**Aspectos relacionados con aspectos psicoemocionales del paciente**

1. Ante una situación de deterioro del ánimo en un paciente en fase avanzada, sabría como actuar.

MUCHO                  REGULAR                  POCO                  NADA

2. Conozco los cuidados y recomendaciones generales a tener en cuenta ante una conspiración de silencio ( acuerdo sobre no decir la verdad al paciente ) por parte de la familia.

MUCHO                  REGULAR                  POCO                  NADA

3. Conozco los test que se aplican para detectar un deterioro cognitivo.

MUCHO                  REGULAR                  POCO                  NADA

4. Dispongo de las habilidades necesarias para reconocer un problema psicoemocional

MUCHO      REGULAR      POCO      NADA

**Aspectos relacionados con aspectos espirituales del paciente**

1. Conozco lo que significa la espiritualidad.

MUCHO      REGULAR      POCO      NADA

2. Sabría reconocer las necesidades espirituales de los residentes.

MUCHO      REGULAR      POCO      NADA
